1 **Cooperation, only for high rewards – a solvable task-based study on free-ranging dogs**

2 Debottam Bhattacharjee<sup>1</sup>, Rohan Sarkar<sup>1</sup>, Shubhra Sau<sup>1</sup>, Daisy Babu<sup>1</sup>, Asawari Albal<sup>1,2</sup>, Diksha Mehta<sup>1,3</sup> and

3 Anindita Bhadra<sup>1\*</sup>

4

5

6 Affiliations:

7 <sup>1</sup> Department of Biological Sciences, Indian Institute of Science Education and Research Kolkata, Nadia, West

8 Bengal, India

9 <sup>2</sup> Indian Institute of Science Education and Research Bhopal, Madhya Pradesh, India

10 <sup>3</sup> Shivaji College, University of Delhi, Delhi, India

11

12 **\* Address for Correspondence**

13 Behaviour and Ecology Lab, Department of Biological Sciences,

14 Indian Institute of Science Education and Research Kolkata

15 Mohanpur Campus, Nadia

16 PIN 741246, West Bengal, INDIA

17

18 \*Corresponding author

19 E-mail: [abhadra@iiserkol.ac.in](mailto:abhadra@iiserkol.ac.in) (AB)

20 tel. +91-33 2502 8000 ext 1223

21 fax +91-33-25873020

22

23

24

25 **Abstract:**

26 The benefits of group living mostly surpass the disadvantages like sharing of resources and competition over  
27 food, space and mates, driving the evolution of social organization. Group living can be facilitated by social  
28 tolerance and cooperation among the group members. Social canids (e.g. wolves) display cooperative breeding,  
29 hunting, and prosocial activities in different contexts. Unlike cooperative pack-living wolves (*Canis lupus*  
30 *lupus*), their descendants, domesticated dogs (*Canis lupus familiaris*), show varying levels of associations from  
31 solitary to stable social groups. Free-ranging dogs are group-living but prefer to forage solitarily, hence  
32 providing an excellent opportunity for investigating social tolerance and coordinated task performance among  
33 the members in various situations. We tested 113 adult-only groups of free-ranging dogs in three different tasks  
34 to investigate group responses and performance in problem-solving situations in the presence of an unfamiliar  
35 human. Task 1 (unfamiliar, single food reward) and 2 (familiar, single food reward) examined group responses  
36 and cooperation from the perspective of familiarity, while Task 3 (familiar, multiple food rewards) enabled us to  
37 test whether increased food rewards promote social tolerance and food sharing among the group members.  
38 Regardless of significantly higher performance in Task 2 compared to Task 1, cooperation and food sharing  
39 were significantly lower in both. Task 3 revealed a strong positive correlation between food sharing and social  
40 tolerance, but not between success and social tolerance, suggesting a tendency for cooperation. We conclude  
41 that context-dependent cooperation and tolerance among group members facilitate group-living in free-ranging  
42 dogs.

43 **Significance statement:** Group living is a common phenomenon in the animal world where the members of a  
44 group show social tolerance and co-operative behaviours towards each other. This need for cooperative intents  
45 increases manifolds while groups face different problem-solving situations in their day to day lives. Here, we  
46 tested a large number of free-ranging dog groups to understand general cooperative intents such as social  
47 tolerance and food sharing in different problem-solving conditions. We found shreds of evidence of context-  
48 dependent cooperation and social tolerance among group members with minimal display of aggression. It is not  
49 adaptive for the dogs to fight or display aggression over resources. Alternatively, use of subtle cues such as  
50 display of dominance and subordination seem to be more plausible mechanisms for the development of efficient  
51 scavenging strategies and maintaining hierarchy.

52 **Keywords:** Group living, free-ranging dogs, task familiarity, cooperation, social tolerance.

53

54 **Introduction:**

55 A wide range of species display differing levels of social organization, from loose groups like herds, to highly  
56 organized societies like in the social insects. Group-living requires cooperation among individuals (Buss 1981;  
57 McCallum et al. 1985) and simultaneous or co-ordinated actions over varied tasks like foraging (Clark and  
58 Mangel 1986), hunting (Packer and Ruttan 1988; Stander 1992; Creel 1997), protection of nests (Lazaro-Perea  
59 2001; Schradin 2004; Brown 2013), rearing of offspring (Stacey and Ligon 1991; Clutton-Brock 2002), etc.  
60 Social behaviour has evolved as an evolutionarily stable strategy across taxa, through multiple selection events,  
61 as the advantages of living in groups compensates for the obvious disadvantages involved in the process, like  
62 the sharing of resources (Axelrod and Hamilton 1981; Kapheim et al. 2015). Sociality involves the emergence  
63 of coordination among members and subsequent cooperation through resolution of conflict, and is thus a  
64 dynamic process (Monnin and Ratnieks 1999; Connor 2000; Franz et al. 2013). Intragroup cooperation  
65 sometime helps to enhance the fitness of the members through increased reproduction, while in some cases,  
66 cooperation is imperative for survival in a harsh environment (Gittleman 1989; Ebensperger et al. 2012).  
67 Cooperation has been suggested to correlate with high social tolerance and low aggression towards group  
68 members (Werdenich and Huber 2002; Scott 2006). Thus, studying basic components of cooperation, like food  
69 sharing, social tolerance, allo-parenting etc. can help to develop an understanding of the evolution of group  
70 dynamics in species.

71 Canids display a wide diversity of social organization from large groups or packs found in species like wolves  
72 (Fox 1971; Macdonald 1983), dholes (Macdonald 1983), etc. to species that live in small groups like foxes (Fox  
73 1971; Lloyd 1981) and jackals (Macdonald 1983). Descendants of the gray wolves, the domestic dogs (*Canis*  
74 *lupus familiaris*) are an interesting example of canids that can live as pets and also in social groups with  
75 interesting social dynamics, as free-ranging populations (Sen Majumder et al., 2014; Paul and Bhadra 2018).  
76 Though most of our current understanding of the behaviour, cognitive abilities and evolutionary history of dogs  
77 is based on studies with pets, majority of the world's dog population is actually free-ranging (Lord et al. 2013),  
78 localized mostly in developing nations. They live without direct human supervision in human-dominated  
79 habitats (Cafazzo, Valsecchi, Bonanni & Natoli, 2010; Hughes & Macdonald, 2013; Sen Majumder et al.,  
80 2014a; Vanak & Gompper, 2009). Several studies have been carried out with individual free-ranging dogs to  
81 understand their physical and social cognitive abilities, in contexts like food preference (Bhadra et al. 2016),  
82 task-solving (Bhattacharjee, Dasgupta, et al., 2017; Brubaker, Dasgupta, Bhattacharjee, Bhadra, & Udell, 2017)

83 and interspecific association with humans (Bhattacharjee et al. 2017b, c), but similar studies have not been  
84 conducted with groups of free-ranging dogs.

85 Free-ranging dogs live in social groups of varying sizes (2 - 15 individuals, from observations). As scavengers,  
86 they forage solitarily most of the time, though this tendency can change during seasons like mating, pup-  
87 emergence, etc., when group foraging increases (Sen Majumder et al., 2014). They are known to scavenge  
88 together over large and open garbage dumps mostly without conflict and aggression (Bhadra et al., 2016; Sen  
89 Majumder et al., 2014). In free-ranging dog groups, mothers provide extensive care to their pups, but also  
90 display conflict over food sharing during the weaning period (Paul & Bhadra, 2017; Paul, Sen Majumder &  
91 Bhadra, 2014b). Allo-parental care is often observed to be provided by both females and males within groups  
92 (Paul, Sen Majumder, & Bhadra, 2014a). Thus, free-ranging dog groups show interesting cooperation-conflict  
93 dynamics in contexts of parental care and foraging.

94 It has previously been shown that wolves better cooperate with their pack members in a string-pulling task  
95 compared to similarly kept and raised dogs (Marshall-Pescini et al. 2017). Pack-living dogs have been shown to  
96 share food with members based on rank positioning, suggesting a role of dominance hierarchy (Dale et al.  
97 2017). Moreover, a steeper dominance hierarchy in such dogs compared to similarly raised wolves has also been  
98 reported (Range et al. 2015). Unfortunately, studies are greatly lacking pertaining to free-ranging dogs' group  
99 performance and cooperation in problem-solving situations, which could give us insights into the maintenance  
100 of group cohesiveness and social hierarchy. Individual free-ranging dogs have been shown to depend on humans  
101 when faced with an unfamiliar task, exhibiting proximity-seeking and gazing behaviours (Bhattacharjee et al.  
102 2017a). While it is essential to test their behaviours individually, it is also necessary to investigate the group  
103 responses to check if the dogs seek help from group members in similar situations and if members of a group  
104 help each other to solve a task and share food. We carried out field-based experiments with free-ranging dog  
105 groups to test their responses in an unfamiliar (Task 1) and two familiar tasks (Task 2 and Task 3) with different  
106 amounts of food rewards in the presence of an unfamiliar human experimenter. Tasks 1 and 2 provided an  
107 option of a moderately large piece of raw chicken as a food reward, while Task 3 provided a considerably higher  
108 amount of food reward in a familiar set-up. In Tasks 1 and 2, we checked how familiarity influences the  
109 problem-solving ability of dogs when present in groups. Task 3 differed from the other two tasks as it did not  
110 exclusively involve problem-solving but simulated a scavenging situation that involved searching for and  
111 obtaining food rewards and allowed for higher options of food sharing. Task 3 further allowed us to investigate

112 social tolerance among group members. Our study was aimed to understand the social tolerance of free-ranging  
113 dogs in their natural groups, group task performance and other associated factors like gazing at humans and  
114 conspecifics in entirely different contexts. We expected that free-ranging dog groups would perform better in  
115 the familiar tasks (Task 2 and 3) than the unfamiliar one (Task 1) and show tolerance among members by  
116 sharing abundant resources (Task 3). Based on earlier observations, we also hypothesized that dogs would gaze  
117 more towards the human experimenter in the unfamiliar task.

## 118 **Materials and Methods:**

### 119 **A. Subjects and Study Sites:**

120 The study was carried out in different parts of West Bengal, India. We tested a total of 113 groups of adult free-  
121 ranging dogs (summing up to a total of 434 dogs) with group sizes ranging from 3 to 10 ( $3.65 \pm 1.26$ ).

122 Individuals ( $\geq 3$ ) that were sighted either resting or moving together, with not more than 1 m distance in  
123 between, were considered as a group. We used three different tasks for the study. Each group was tested only  
124 once with a randomly assigned task. The study was carried out at random locations including residential areas,  
125 market places, bus stops, and railway stations between 0900 hours and 1700 hours, during April – July 2016.  
126 We carried out the trials in different locations to eliminate the possibility of re-testing a group. Besides, a large  
127 area (~ 456 sq km) was covered to eliminate any re-sampling completely. We relied on the coat colour, scar  
128 marks and specific colour patches on the body of the dogs as distinguishing characters for individuals, and the  
129 territorial nature of the dogs as identities of the groups tested.

### 130 **B. Experimental Procedure:**

131 As mentioned above, three different tasks were used in the study, with each group being tested for only one task.  
132 For each task, the experimenter (E) walked on random streets in a pre-selected locality in search of groups of  
133 free-ranging dogs. On sighting a group, E tried to attract the attention of the individuals by calling out to them  
134 prior to the commencement of the trial (see Bhattacharjee et al 2017). All the groups which responded and  
135 approached E were used for the task subsequently. Tasks were recorded by a cameraperson from a distance to  
136 avoid any interactions with the dogs.

137 *Task 1:* Free-ranging dogs are accustomed to scavenging from garbage bins, open garbage or closed plastic bags  
138 carrying food and/or garbage. This task was designed to mimic a scavenging condition but from an unfamiliar  
139 source. It required the dogs to obtain food from a transparent plastic container (0.11 m x 0.11 m x 0.06 m) that

140 had a hole pierced in one corner of the lid through which a nylon rope (length – 0.2 m) had been inserted and  
141 attached such that pulling the rope could open the lid of the box. In an earlier experiment, individual free-  
142 ranging dogs have been observed to attempt the task but failed to solve it on most occasions (Udell 2015;  
143 Brubaker et al. 2017; Bhattacharjee et al. 2017a). Hence this task was considered to be suitable for testing if  
144 group members would cooperate to solve the task. E allowed the dogs of the focal group to sniff a boneless raw  
145 chicken piece (approximately 0.05 – 0.06 kg in weight) and placed it inside the box. E then placed the box on  
146 the ground, approximately 1 m away from the focal group and approximately equidistant to the group members,  
147 and moved back to a distance of 0.5 m. Thus, the initial distance between E and the dogs was approximately 1.5  
148 m. E stood in a neutral posture and looked straight ahead without bending his/her head or making eye contact  
149 with any of the focal group dogs. The response was recorded for 120 seconds or until the dogs ate the raw  
150 chicken piece, whichever was earlier, following which the food was removed. Forty-four adult dog groups were  
151 tested for this task.

152 *Task 2:* In this task, we provided dog groups with a piece of raw chicken as a reward, placed inside a transparent  
153 plastic bag (0.19 m x 0.11 m). The experimenter allowed dogs of the focal group to sniff the chicken piece  
154 before placing it inside the plastic bag and tying the mouth of the bag with a thread, allowing the dogs to watch  
155 the process (Bhattacharjee et al. 2017a). All the other steps were as in Task 1 and the response was recorded for  
156 120 seconds. 43 adult dog groups were tested for this task.

157 *Task 3:* In this condition, the dog groups were provided with one open plastic basket (0.30 m x 0.07 m x 0.14 m)  
158 containing non-edible garbage (dry paper, plastic, leaves etc.) and food rewards, thus emulating a garbage bin  
159 (**Fig 1**). The food reward consisted of five pieces of raw chicken and five pieces of bread (representing proteins  
160 and carbohydrates respectively), which were mixed with the garbage, as is the case in most waste disposal sites  
161 that are accessible to free-ranging dogs in India. Since the task, in this case, did not involve opening the basket  
162 to reach the food, the time provided for the task was 60 seconds, instead of 120 seconds, starting after the basket  
163 was placed on the ground. All other steps were the same as in the other two tasks. 26 adult dog groups were  
164 tested for this task.

165 The nature of the three tasks differed in terms of their familiarity, quantity of rewards, and to some extent  
166 difficulty. Task 1 had earlier been shown to be solved by individual free-ranging dogs, suggesting no physical  
167 limitation on part of the dogs. However, a small success rate could be addressed by ‘task difficulty’ along with  
168 unfamiliarity, also, Task 2 was highly familiar for these dogs from a scavenging perspective and solved at a

169 higher rate compared to Task 1 (Bhattacharjee et al. 2017a). In order to eliminate any anthropomorphic bias, we  
170 have emphasized the familiarity of the tasks (Task 1 and 2), rather than their difficulty levels. Task 3  
171 represented a condition which did not involve problem-solving but allowed us to understand co-feeding and  
172 social tolerance. To be better able to understand the various projections of our study, we first compared Task 1  
173 and 2 in order to check for an effect of familiarity and cooperation and later analysed Task 3 (compared a few  
174 parameters with tasks 1 and 2) to address whether changes in the quantity of available food resources potentially  
175 promotes sharing behaviour/ social tolerance in free-ranging dogs.

### 176 **C. Data analysis and statistics:**

177 All the videos of task performance and associated behaviours were coded by an individual, which were then  
178 used for further analysis. Another individual, blind to the experiment, coded 20% of the data selected randomly.  
179 Reliability for success, latency, persistence and gazing measures was found to be high (success: Cohen's kappa  
180 = 0.99; latency: kappa = 0.99; persistence: kappa = 0.96; gazing: kappa = 0.97). Shapiro-Wilk tests were  
181 conducted to check for normality of the data. The data were not normally distributed. Thus we performed non-  
182 parametric tests. Alpha level was 0.05 throughout the analysis. R Studio and StatistiXL version 1.11.0.0 were  
183 used for the analyses.

184 Following is the list of behaviours/parameters that were quantified from the study –

185 (i) Success – Opening the container or plastic bag and obtaining the food reward was considered as a successful  
186 event in tasks 1 and 2 respectively. The success rate in a trial of Task 3 was estimated on the basis of the number  
187 of food pieces left after 60 seconds. For example, empty basket (all 5 pieces of bread and 5 pieces of chicken  
188 eaten) after a trial corresponds to 100% success. We have analyzed success rates at two different ranges – less  
189 than 50% and more than or equal to 50%, in order to get an idea of lower and higher success rates respectively.

190 (ii) Latency – The time between the presentation of the task before the dogs and the display of first response,  
191 which involved approach within a distance of 0.05 – 0.1m of the task set-up was defined as latency. We used  
192 markers (e.g. leaves, small stones) to get an idea of the distances. Latencies for all the dogs in a group were  
193 recorded but only the latency of the first dog that approached a task was considered for the analysis.

194 (iii) Persistence – Persistence was defined as the duration of active engagement or involvement in the task. We  
195 considered active engagement when dogs showed the following behaviours with the objects (box/bag/basket) -  
196 'touching', 'licking', 'pulling', and 'obtaining the food reward(s)'. Persistence was exclusive of the duration of

197 interruptions when dogs were not actively engaged in task solving. Calculation of persistence was cumulative.

198 We quantified (a) Persistence of individuals (persistence of each group member), (b) Group persistence (average

199 persistence of the members of a group) and (c) Persistence of the solving individual (persistence of a group

200 member that finally solved a task, Task 1 and 2 specific).

201 (iv) Cooperation (Task 1 and 2 specific) – Two or more individuals of a group acting together, without

202 aggressive interactions, to solve a task was considered as cooperation or simultaneous engagement at the task.

203 We calculated the number of individuals (at least 2) persisting on a task and the duration of overlap to define

204 cooperation.

205 (v) Social tolerance (Task 3 specific) – Social tolerance was defined as a tendency of the group members to

206 scavenge from the same resource side by side without aggression. In order to measure this, a ‘Tolerance Index’

207 (ToI) was constructed for each individual in a group. ToI intended to evaluate the extent to which the group

208 members performed the task together and was not meant to compute the evolutionary benefits being incurred by

209 the individuals due to such an action.

210 We used the following parameters while constructing ToI:

211 • Number of individuals that a focal dog can interact with - for example, in a group of 4 individuals, a  
212 focal dog would be able to interact with a maximum of 3 individuals.

213 • Availability of time to solve a task - here we subtracted the latency from the total task duration. For  
214 example, in a task of 120 seconds, a focal dog with a latency of 10 seconds would have 110 seconds of  
215 time available for cooperation.

216 • Overlap with other members - we calculated the number of individuals that were already engaged in  
217 the task when a focal dog joined. Similarly, the duration of the overlap was also calculated. For  
218 example, in a group of 4 individuals, a focal dog’s active engagement with a task overlapped with 2  
219 other members of the group for 30 seconds and with another member for 10 seconds. While calculating  
220 ToI, we first multiplied the proportion of individuals that the focal dog tolerated ( $2/3$  and  $1/3$ ) with the  
221 proportion of time available that it spent with each in the task ( $30/110$  and  $10/110$ , considering the  
222 availability of task time as 110 sec), and then added the two values  $\{(2/3 * 30/110) + (1/3 * 10/110)\}$ .

223 • Leaving – We used two parameters to assess the situation at the point when a focal dog left the task;  
224 the time remaining for the task and the proportion of group members engaged in the task. For example,



225 if the above focal dog left the task at 90 seconds while two of the group members were actively  
226 engaged with the task at that time, this factor was calculated as  $2/3 * 20/110$ .

227 We used the following formula to calculate ToI -

$$\text{ToI} = \left(\frac{n_1}{N}\right) + \left\{\left(\frac{t_1}{T}\right) \times \left(\frac{x_1}{N}\right)\right\} + \left\{\left(\frac{t_2}{T}\right) \times \left(\frac{x_2}{N}\right)\right\} + \dots + \left\{\left(\frac{t_n}{T}\right) \times \left(\frac{x_n}{N}\right)\right\} - \left\{\left(\frac{t_L}{T}\right) \times \left(\frac{x_L}{N}\right)\right\}$$

228 [N = (Total group size - 1); i.e., the number of individuals in the group a focal dog can interact with; T = Total  
229 duration of the experiment - latency of the focal animal;  $n_1$  = number of individuals engaged in the task when  
230 the focal dog joins;  $t_n$  = duration of overlap with  $x_n$  number of individuals;  $t_L$  = time remaining for the  
231 experiment when the focal dog leaves the task;  $x_L$  = number of individuals engaged in the task when the focal  
232 dog leaves].

233 We calculated the ToI values for the individuals that approached in Task 3. Lesser ToI value of an individual  
234 indicated a lower tendency to act together with its group members, i.e., a lower intention for food sharing and  
235 cooperation. We also calculated the mean ToI values of the groups to check for any correlation with  
236 corresponding success rates.

237 (vi) Food sharing – Sharing of food rewards without aggression among the group members (at least within 2  
238 members) was considered as food sharing. For task 3, co-feeding was the proxy for food sharing. Co-feeding  
239 was determined by calculating the percentage of group members feeding together in Task 3. For example, in a  
240 group of 4 individuals, 100% sharing indicated that all the group members had fed/scavenged together, whereas,  
241 75% sharing was recorded when 3 of them was observed to co-feed.

242 (vii) Gazing - The duration of gazing at the upper body of the human experimenter was recorded. Gazing  
243 towards the conspecifics was also quantified.

244 (viii) Aggression – Aggressive behaviours were aimed towards the conspecifics and included threatening  
245 responses. We quantified the following behaviours as aggressive during the tasks: snarling (aggressive vocal  
246 response to a group member), threatening (growling/barking at another dog with alert posture having ears  
247 pointed) and biting. Neutral and affiliative responses were treated as no aggression. Affiliative behaviours  
248 included proximity seeking, contact seeking, social facilitation, tail wagging, and relaxed posture, while neutral  
249 responses were restricted to resting, self-care (scratching, licking, grooming) and general disinterest.

250 (ix) First inspection, highest persistence and retrieval of food reward – Since free-ranging dogs are scavengers,  
251 we hypothesize that an opportunistic individual would inspect a task first, persist most and obtain the food in  
252 case of Task 1 and 2, illustrating a strategy of 1-1-1 (rank 1 for inspection, persistence and retrieval of food

253 reward). For Task 3 it was difficult to gauge the actual amount of food obtained by an individual but we  
254 assumed the time spent by an individual in feeding as a correlate of the amount of food eaten. Groups that failed  
255 to obtain food rewards were not considered for this calculation.

256

## 257 **Results**

### 258 *Task 1 vs Task 2:*

259 (i) Success - The dog groups performed significantly better in Task 2 than in Task 1 (**Fig. 2**). Success rates for  
260 Task 2 and 1 were 95% and 23% respectively (Chi-squared goodness of fit,  $\chi^2 = 45.547$ ,  $d_{\text{Cohen}} = 2.096$ ,  $N = 87$ ,  
261  $df = 1$ ,  $p < 0.0001$ ).

262 (ii) Latency – Latencies varied significantly between Tasks 1 and 2 (Mann-Whitney U test,  $U = 1160.500$ ,  $d_{\text{Cohen}}$   
263  $= 0.45$ ,  $N = 86$ ,  $df1 = 43$ ,  $df2 = 43$ ,  $p = 0.04$ ). Individuals from one group did not respond in Task 1 and hence  
264 the total sample size reduced by 1 to 86. Dogs showed significantly faster response ( $1.16 \pm 0.37$  sec) in Task 2  
265 as compared to Task 1 ( $1.60 \pm 0.90$  sec).

266 (iii) Persistence – (a) Persistence of individuals - members of a group that approached a task were considered for  
267 the analyses (Sample size: Task 1 – 126, Task 2 – 92). We obtained no difference between Tasks 1 and 2  
268 (Mann-Whitney U test,  $U = 6288.000$ ,  $d_{\text{Cohen}} = 0.145$ ,  $df1 = 126$ ,  $df2 = 92$ ,  $p = 0.286$ ). (b) Group persistence –  
269 Average persistence of the groups did not differ between Tasks 1 and 2 (Mann-Whitney U test,  $U = 997.000$ ,  
270  $d_{\text{Cohen}} = 0.093$ ,  $df1 = 44$ ,  $df2 = 43$ ,  $p = 0.670$ ). (c) Persistence of the solving individuals - There was no  
271 significant difference in persistence between the individuals that finally solved Tasks 1 and 2 (Mann-Whitney U  
272 test,  $U = 218.000$ ,  $d_{\text{Cohen}} = 0.086$ ,  $df1 = 10$ ,  $df2 = 41$ ,  $p = 0.770$ ).

273 (iv) Cooperation – We found a difference in the duration of cooperation between the tasks (Mann-Whitney U  
274 test,  $U = 1813$ ,  $d_{\text{Cohen}} = 0.793$ ,  $df1 = 54$ ,  $df2 = 47$ ,  $p < 0.0001$ ). Groups in Task 1 engaged with the task together  
275 longer ( $4.94 \pm 6.37$  sec) compared to Task 2 ( $1.08 \pm 1.62$ ). In both the tasks, ‘pairs’ from the groups were seen  
276 as cooperating units more often than ‘triads’ and ‘tetrad or more’ (Task 1 - Kruskal-Wallis test,  $\chi^2 = 15.648$ ,  
277  $d_{\text{Cohen}} = 1.209$ ,  $df = 2$ ,  $p < 0.0001$ , Task 2 - Kruskal-Wallis test,  $\chi^2 = 28.224$ ,  $d_{\text{Cohen}} = 2.429$ ,  $df = 2$ ,  $p < 0.0001$ ,  
278 **Fig 3, Supplementary Text 1**).

279 (v) Food sharing – We found absolutely zero sharing of food in Tasks 1 and 2. None of the group members  
280 shared the retrieved food rewards with their conspecifics.

281 (vi) Gazing – Dogs gazed at the human experimenter significantly more than the conspecifics in Task 1 (Mann-  
282 Whitney U test,  $U = 29424.500$ ,  $d_{\text{Cohen}} = 2.639$ ,  $df_1 = 175$ ,  $df_2 = 175$ ,  $p < 0.0001$ ). However, in Task 2, there  
283 was no such difference (Mann-Whitney U test,  $U = 13675.500$ ,  $d_{\text{Cohen}} = 0.118$ ,  $df_1 = 160$ ,  $df_2 = 160$ ,  $p < 0.291$ ).

284 (vii) Aggression – Dogs displayed very less aggression towards their group members in both the tasks.  
285 Approximately 7% and 14% of the dogs showed aggressive behaviours in Tasks 1 and 2 respectively; the level  
286 of aggression was comparable between the two tasks (Chi-squared goodness of fit,  $\chi^2 = 2.333$ ,  $d_{\text{Cohen}} = 0.332$ ,  $N = 87$ ,  $df = 1$ ,  $p = 0.12$ ). Aggression was less compared to all the other (both affiliative and neutral together)  
287 behaviours displayed during the tasks (Task 1: Goodness of fit,  $\chi^2 = 32.818$ ,  $d_{\text{Cohen}} = 3.426$ ,  $N = 44$ ,  $df = 1$ ,  $p <$   
288  $0.0001$ ; Task 2: Goodness of fit,  $\chi^2 = 22.349$ ,  $d_{\text{Cohen}} = 2.080$ ,  $N = 43$ ,  $df = 1$ ,  $p < 0.0001$ ).

290 (viii) First inspection, highest persistence and retrieval of food reward – A total of 51 groups of dogs  
291 successfully solved Tasks 1 and 2 (Task 1 – 10, Task 2 – 41). We pooled data from both the tasks to estimate the  
292 proportion of groups in which the first individual to respond to the task was also the one to have persisted the  
293 longest and solved the task. In 37 out of 51 groups, the individual which inspected a task first showed highest  
294 persistence and also retrieved the reward. We found a difference between the groups that showed a first  
295 inspection – highest persistence – retrieval of food reward strategy and groups that did not (Goodness of fit,  $\chi^2 =$   
296  $10.373$ ,  $d_{\text{Cohen}} = 1.01$ ,  $N = 51$ ,  $df = 1$ ,  $p = 0.001$ ).

297 *Task 3:*

298 (i) Success - Out of 26 groups, only 3 groups showed 100% success and 2 groups showed zero success.  
299 However, we found no difference between the two ranges of the success rates considered for Task 3 (lower (<  
300 50%) and higher ( $\geq 50\%$ ) success rates; Chi-squared goodness of fit,  $\chi^2 = 1.385$ ,  $d_{\text{Cohen}} = 0.474$ ,  $N = 26$ ,  $df = 1$ ,  
301  $p = 0.239$ ), indicating a somewhat uniform distribution between 0% - 100% (**Fig 4**).

302 (ii) Latency – Dogs appeared to be quite hesitant in approaching Task 3 ( $6.84 \pm 7.26$  sec). Latency of the dogs in  
303 Task 3 differed from both Task 1 (Mann-Whitney U test,  $U = 881.000$ ,  $d_{\text{Cohen}} = 1.094$ ,  $df_1 = 43$ ,  $df_2 = 26$ ,  $p <$   
304  $0.001$ ) and 2 (Mann-Whitney U test,  $U = 972.000$ ,  $d_{\text{Cohen}} = 1.563$ ,  $df_1 = 43$ ,  $df_2 = 26$ ,  $p < 0.001$ ).

305 (iii) Persistence – (a) Persistence of individuals – A total of 58 individuals, considering all the groups, persisted  
306 in Task 3. Persistence of individuals was found to be higher in Task 3 compared to individuals in Task 1 (Mann-  
307 Whitney U test,  $U = 5875.500$ ,  $d_{\text{Cohen}} = 1.118$ ,  $df_1 = 126$ ,  $df_2 = 58$ ,  $p < 0.001$ ) and Task 2 (Mann-Whitney U  
308 test,  $U = 4184.500$ ,  $d_{\text{Cohen}} = 1.088$ ,  $df_1 = 92$ ,  $df_2 = 58$ ,  $p < 0.001$ ).

309 (b) Group persistence – We found the average group persistence between the three tasks to be significantly  
310 different (Kruskal-Wallis test,  $\chi^2 = 27.053$ ,  $d_{\text{Cohen}} = 1.086$ ,  $df = 2$ ,  $p < 0.0001$ ). Post-hoc pairwise comparisons  
311 revealed similar outcomes as found in individual persistence. In Task 3, groups showed higher persistence  
312 compared to Task 1 (Mann-Whitney U test,  $U = 962.000$ ,  $d_{\text{Cohen}} = 1.375$ ,  $df_1 = 44$ ,  $df_2 = 26$ ,  $p < 0.0001$ ) and  
313 Task 2 (Mann-Whitney U test,  $U = 929.500$ ,  $d_{\text{Cohen}} = 1.325$ ,  $df_1 = 43$ ,  $df_2 = 26$ ,  $p < 0.0001$ ).

314 (iv) Social tolerance – ToI values of the all the dogs ranged between 0 and 1 ( $0.22 \pm 0.31$ ). We found a strong  
315 positive correlation between food sharing in the groups and their ToI values (Spearman rank correlation,  $r_s =$   
316  $0.816$ ,  $df = 26$ ,  $p < 0.001$ , **Fig 5**). However, there was no correlation between success rates (feeding) of the  
317 groups and their ToI values (Spearman rank correlation,  $r_s = 0.281$ ,  $df = 26$ ,  $p = 0.164$ ).

318 (v) Gazing - Dogs displayed higher gazing at the conspecifics than the human experimenter in Task 3 (Mann-  
319 Whitney U test,  $U = 6080.000$ ,  $d_{\text{Cohen}} = 0.425$ ,  $df_1 = 99$ ,  $df_2 = 99$ ,  $p = 0.003$ ).

320 (vi) Aggression – Close to 11% of the dogs elicited aggressive responses towards their group members.  
321 Aggression was significantly less compared to neutral and affiliative behaviours together (Goodness of fit,  $\chi^2 =$   
322  $15.385$ ,  $d_{\text{Cohen}} = 2.407$ ,  $N = 26$ ,  $df = 1$ ,  $p < 0.0001$ ).

323 (vii) First inspection, highest persistence and retrieval of food reward – We considered 22 groups that responded  
324 and persisted in Task 3 for this calculation. Similar to Task 1 and 2, we found groups that showed the 1-1-1  
325 condition higher in Task 3 (Goodness of fit,  $\chi^2 = 8.909$ ,  $d_{\text{Cohen}} = 1.649$ ,  $N = 22$ ,  $df = 1$ ,  $p = 0.003$ ).

## 326 **Discussion:**

327 Our study revealed that free-ranging dog groups performed better in the familiar task (Task 2) as compared to  
328 the unfamiliar one (Task 1) when faced with tasks with single food rewards. This was consistent with the earlier  
329 findings with individual free-ranging dogs and further substantiates dogs' inferior abilities in physical cognitive  
330 task solving situations like string pulling (Osthaus et al. 2005; Bhattacharjee et al. 2017a). Dogs also showed a  
331 much faster reaction to Task 2 than Task 1, emphasizing the role of familiarity (Bhattacharjee et al. 2017a). In  
332 case of Task 3, the uniform distribution of success rates across 0 – 100% did not help in providing any useful  
333 insights into the free-ranging dogs' scavenging abilities. In spite of its familiar nature, dogs took longer to  
334 approach the set-up in Task 3 relative to the other tasks. Such outcomes could be attributed to fear or hesitation  
335 due to the unusual way of food provisioning by an unknown human. Free-ranging dogs in India are generally  
336 reluctant to approach garbage bins while humans are still around for disposal of garbage/leftover food as, in

337 such cases, dogs are, typically, shooed away, threatened or beaten by people. A very recent study quantifying  
338 free-ranging dog's scavenging efficiency reported similar results (Sarkar et al. 2019) Thus, we suspect the  
339 reasons mentioned above to be the cause for longer approach time of dogs in Task 3.

340 Dogs displayed higher cooperation in Task 1 compared to Task 2, which could be attributed to an unfamiliar  
341 nature and difficulty level of the task. However, success did not depend on cooperation in those tasks. We also  
342 reckon two underlying factors that could have influenced the outcomes - (i) non-availability of a set-up where  
343 group members of a large group can perform together, and (ii) presence of a moderately large single food  
344 reward. It was also noted that members who inspected a task first, persisted more and obtained the food reward  
345 and no food sharing was observed in any of the two tasks. This is suggestive of the presence of a feeding  
346 hierarchy in free-ranging dog groups, as aggression over the reward was not observed. It is difficult to examine  
347 and disentangle the factors mentioned above with the current experimental set-up and require further  
348 experimentation. The shortcomings were overcome to some extent with the experimental design of Task 3. It  
349 provided evidence of social tolerance, co-feeding and thereby general cooperation among the group members  
350 when higher food rewards were available. The minimal display of aggressive behaviour towards each other also  
351 corroborated the existence of some level of understanding of hierarchy within the group. Both the individual and  
352 group average persistence were found to be higher in Task 3, which could be attributed to the lower effort  
353 required to find food and the higher quantity of food available. In a nutshell, differing food levels affected the  
354 group responses strikingly.

355 Gazing responses provided significant information relating to both intra and interspecific communication.  
356 Gazing has been considered as a striking means of communication in canids (Miklósi et al. 2000; Hare and  
357 Tomasello 2005). It has previously been shown that dogs gaze at human experimenters when faced with  
358 unfamiliar or difficult tasks (Szetei et al. 2003; Udell 2015; Brubaker et al. 2017; Bhattacharjee et al. 2017a).  
359 The higher rates of gazing at the human experimenter in Task 1 could be associated with information seeking.  
360 This statement is further strengthened by the lack of gazing responses during Task 2, when the dogs faced a  
361 familiar task that they could solve independently (Bhattacharjee et al. 2017a). However, this does not rule out  
362 the chances of dogs being vigilant or alert when encountering an unfamiliar human at proximity. Relatively  
363 higher gazing at the group members during Task 3 is likely to be used for figuring out other group members'  
364 intentions to approach the task. Studies have concluded that being able to estimate the intentions of others is  
365 vital across social contexts like maintenance of social cohesiveness (Cheney et al. 1986; Friedkin 2004),

366 availing sneaky mating opportunities (Alberts et al. 2003), territorial defence (Crockford et al. 2012),  
367 challenging the higher ranking individuals to take over a group (Rowell 1974) etc. It might also help dogs to  
368 maintain cohesion and structure within the group during scavenging.

369 Members of free-ranging dog groups seemed to lack the tendency to perform together in solving physical  
370 cognitive tasks, but they do show tolerance towards each other, resulting in considerably higher food sharing.  
371 Cooperation in the form of social tolerance and co-feeding is a primer for a higher level of cognitive complexity,  
372 which requires coordination and communication between group members. The current set of experiments  
373 demonstrate that free-ranging dog groups are capable of showing social tolerance towards group members  
374 during scavenging and can also exhibit co-feeding, but further experimentation is required to investigate how  
375 the groups are maintained and persist over time. From these experiments, we conclude that free-ranging dogs  
376 can cooperate with their group members during scavenging, but choose to do so based on context, e.g. when  
377 high rewards are available. This observation substantiates earlier observations that free-ranging dogs tend to  
378 scavenge solitarily most of the time, possibly to avoid potential conflict, but forage in pairs or larger groups in  
379 social contexts like mating and pup rearing (Sen Majumder et al., 2014). This study provides further testimony  
380 to the flexible social organization in these dogs, which demonstrate interesting cooperation-conflict dynamics  
381 within their social groups. Free-ranging dogs survive in a human-dominated environment, where aggression  
382 between dogs is met with intolerance from humans. Hence, maintaining feeding hierarchies using aggression or  
383 fighting over resources is not adaptive for the dogs. On the other hand, the use of subtle cues like display of  
384 dominance and subordination through postures and vocalizations might be an effective mechanism for  
385 maintaining hierarchies that help to develop efficient scavenging strategies. Long term observations of group-  
386 level behaviour of the free-ranging dogs would help to provide deeper insights into how such hierarchies are  
387 established and maintained.

### 388 **Acknowledgements**

389 We would like to thank Ms. Ankurita Mondal for helping with the video recording for some of the trials.

### 390 **Funding**

391 This study was partially supported by the SERB Women's Excellence Award to AB (SB/WEA-005/2013). DB  
392 was supported by a DST INSPIRE Fellowship. AA was supported by the IASc-INSA-NASI Summer Research

393 Fellowship program; DM was supported by IISER Kolkata summer fellowship program. We thank Indian  
394 Institute of Science Education and Research (IISER) Kolkata for providing infrastructural support for this work.

#### 395 **Data availability**

396 The datasets analysed during the current study are available from the corresponding author on reasonable  
397 request.

#### 398 **Compliance with ethical standards**

#### 399 **Conflict of interest**

400 The authors declare that they have no conflict of interest.

#### 401 **Ethical approval**

402 The study design did not violate the Animal Ethics regulations of the Government of India (Prevention of  
403 Cruelty to Animals Act 1960, Amendment 1982). The protocol for the experiment was approved by the IISER  
404 Kolkata Animal Ethics Committee, as part of a larger project sanctioned by the SERB (EMR/2016/000595).

#### 405 **Informed consent**

406 All the human participants involved in this study gave their consent.

#### 407 **References**

408 Alberts SC, Watts HE, Altmann J (2003) Queuing and queue-jumping: long-term patterns of reproductive skew  
409 in male savannah baboons, *Papio cynocephalus*. *Animal Behaviour* 65:821–840. doi:

410 10.1006/anbe.2003.2106

411 Axelrod R, Hamilton W (1981) The evolution of cooperation. *Science* 211:1390–1396. doi:

412 10.1126/science.7466396

413 Bhadra A, Bhattacharjee D, Paul M, et al (2016) The meat of the matter: a rule of thumb for scavenging dogs?

414 *Ethology Ecology & Evolution* 28:427–440. doi: 10.1080/03949370.2015.1076526

415 Bhattacharjee D, Dasgupta S, Biswas A, et al (2017a) Practice makes perfect: familiarity of task determines

416 success in solvable tasks for free-ranging dogs (*Canis lupus familiaris*). *Animal Cognition* 20:771–776.

417 doi: 10.1007/s10071-017-1097-3

- 418 Bhattacharjee D, Nikhil Dev N, Gupta S, et al (2017b) Free-ranging dogs show age related plasticity in their  
419 ability to follow human pointing. PLoS ONE 12:. doi: 10.1371/journal.pone.0180643
- 420 Bhattacharjee D, Sau S, Das J, Bhadra A (2017c) Free-ranging dogs prefer petting over food in repeated  
421 interactions with unfamiliar humans. The Journal of Experimental Biology jeb.166371. doi:  
422 10.1242/jeb.166371
- 423 Brown M (2013) Food and range defence in group-living primates. Animal Behaviour 85:807–816. doi:  
424 10.1016/j.anbehav.2013.01.027
- 425 Brubaker L, Dasgupta S, Bhattacharjee D, et al (2017) Differences in problem-solving between canid  
426 populations: Do domestication and lifetime experience affect persistence? Animal Cognition 20:717–723.  
427 doi: 10.1007/s10071-017-1093-7
- 428 Buss LW (1981) Group living, competition, and the evolution of cooperation in a sessile invertebrate. Science  
429 (New York, NY) 213:1012–4. doi: 10.1126/science.213.4511.1012
- 430 Cafazzo S, Valsecchi P, Bonanni R, Natoli E (2010) Dominance in relation to age, sex, and competitive contexts  
431 in a group of free-ranging domestic dogs. Behavioral Ecology 21:443–455. doi: 10.1093/beheco/arq001
- 432 Cheney D, Seyfarth R, Smuts B (1986) Social relationships and social cognition in nonhuman primates. Science  
433 234:1361–1366. doi: 10.1126/science.3538419
- 434 Clark CW, Mangel M (1986) The evolutionary advantages of group foraging. Theoretical Population Biology  
435 30:45–75. doi: 10.1016/0040-5809(86)90024-9
- 436 Clutton-Brock T (2002) Breeding Together: Kin Selection and Mutualism in Cooperative Vertebrates. Science  
437 296:69–72. doi: 10.1126/science.296.5565.69
- 438 Connor RC (2000) Group Living in Whales and Dolphins. In: Cetacean Societies: Field Studies of Dolphins and  
439 Whales. pp 199–218
- 440 Creel S (1997) Cooperative hunting and group size: assumptions and currencies. Animal Behaviour 54:1319–  
441 1324. doi: 10.1006/anbe.1997.0481
- 442 Crockford C, Wittig RM, Mundry R, Zuberbühler K (2012) Wild Chimpanzees Inform Ignorant Group  
443 Members of Danger. Current Biology 22:142–146. doi: 10.1016/j.cub.2011.11.053



- 444 Dale R, Range F, Stott L, et al (2017) The influence of social relationship on food tolerance in wolves and dogs.  
445 Behavioral Ecology and Sociobiology 71:107. doi: 10.1007/s00265-017-2339-8
- 446 Ebensperger LA, Rivera DS, Hayes LD (2012) Direct fitness of group living mammals varies with breeding  
447 strategy, climate and fitness estimates. Journal of Animal Ecology 81:1013–1023. doi: 10.1111/j.1365-  
448 2656.2012.01973.x
- 449 Fox M (1971) Behaviour of wolves dogs and related canids. Dogwise Publishing
- 450 Franz M, Schülke O, Ostner J (2013) Rapid evolution of cooperation in group-living animals. BMC  
451 Evolutionary Biology 13:235. doi: 10.1186/1471-2148-13-235
- 452 Friedkin NE (2004) Social Cohesion. Annual Review of Sociology 30:409–425. doi:  
453 10.1146/annurev.soc.30.012703.110625
- 454 Gittleman JL (1989) Carnivore Group Living: Comparative Trends. In: Carnivore Behavior, Ecology, and  
455 Evolution. Springer US, Boston, MA, pp 183–207
- 456 Hare B, Tomasello M (2005) Human-like social skills in dogs? Trends in Cognitive Sciences 9:439–444
- 457 Hughes J, Macdonald DW (2013) A review of the interactions between free-roaming domestic dogs and  
458 wildlife. Biological Conservation 157:341–351. doi: 10.1016/j.biocon.2012.07.005
- 459 Kapheim KM, Pan H, Li C, et al (2015) Genomic signatures of evolutionary transitions from solitary to group  
460 living. Science 348:. doi: 10.1126/science.aaa4788
- 461 Lazaro-Perea C (2001) Intergroup interactions in wild common marmosets, *Callithrix jacchus*: territorial  
462 defence and assessment of neighbours. Animal Behaviour 62:11–21. doi: 10.1006/anbe.2000.1726
- 463 Lloyd H (1981) The red fox, 2nd edn. London, Batsford
- 464 Lord K, Feinstein M, Smith B, Coppinger R (2013) Variation in reproductive traits of members of the genus  
465 *Canis* with special attention to the domestic dog (*Canis familiaris*). Behavioural Processes 92:131–142.  
466 doi: 10.1016/j.beproc.2012.10.009
- 467 Macdonald DW (1983) The ecology of carnivore social behaviour. Nature 301:379–384. doi: 10.1038/301379a0
- 468 Majumder S Sen, Bhadra A, Ghosh A, et al (2014) To be or not to be social: foraging associations of free-

- 469 ranging dogs in an urban ecosystem. *acta ethologica* 17:1–8. doi: 10.1007/s10211-013-0158-0
- 470 Marshall-Pescini S, Schwarz JFL, Kostelnik I, et al (2017) Importance of a species' socioecology: Wolves  
471 outperform dogs in a conspecific cooperation task. *Proceedings of the National Academy of Sciences*  
472 114:11793–11798. doi: 10.1073/pnas.1709027114
- 473 McCallum DM, Haring K, Gilmore R, et al (1985) Competition and cooperation between groups and between  
474 individuals. *Journal of Experimental Social Psychology* 21:301–320. doi: 10.1016/0022-1031(85)90032-0
- 475 Miklósi A, Polgárdi R, Topál J, Csányi V (2000) Intentional behaviour in dog-human communication: An  
476 experimental analysis of “showing” behaviour in the dog. *Animal Cognition* 3:159–166. doi:  
477 10.1007/s100710000072
- 478 Monnin T, Ratnieks FLW (1999) Reproduction versus work in queenless ants: When to join a hierarchy of  
479 hopeful reproductives? *Behavioral Ecology and Sociobiology* 46:413–422. doi: 10.1007/s002650050637
- 480 Osthaus B, Lea SEG, Slater AM (2005) Dogs (*Canis lupus familiaris*) fail to show understanding of means-end  
481 connections in a string-pulling task. *Animal Cognition* 8:37–47. doi: 10.1007/s10071-004-0230-2
- 482 Packer C, Ruttan L (1988) The Evolution of Cooperative Hunting. *The American Naturalist* 132:159–198. doi:  
483 10.1086/284844
- 484 Paul M, Bhadra A (2017) Selfish Pups: Weaning Conflict and Milk Theft in Free-Ranging Dogs. *PLOS ONE*  
485 12:e0170590. doi: 10.1371/journal.pone.0170590
- 486 Paul M, Majumder S Sen, Bhadra A (2014a) Selfish mothers? An empirical test of parent-offspring conflict over  
487 extended parental care. *Behavioural Processes* 103:17–22. doi: 10.1016/j.beproc.2013.10.006
- 488 Paul M, Majumder S Sen, Bhadra A (2014b) Grandmotherly care: a case study in Indian free-ranging dogs.  
489 *Journal of Ethology* 32:75–82. doi: 10.1007/s10164-014-0396-2
- 490 Range F, Ritter C, Viranyi Z (2015) Testing the myth: tolerant dogs and aggressive wolves. *Proceedings of the*  
491 *Royal Society B: Biological Sciences* 282:20150220–20150220. doi: 10.1098/rspb.2015.0220
- 492 Rowell TE (1974) The concept of social dominance. *Behavioral Biology* 11:131–154. doi: 10.1016/S0091-  
493 6773(74)90289-2

- 494 Sarkar R, Sau S, Bhadra A (2019) Scavengers can be choosers: A study on food preference in free-ranging dogs.  
495 Applied Animal Behaviour Science. doi: 10.1016/j.applanim.2019.04.012
- 496 Schradin C (2004) Territorial defense in a group-living solitary forager: who, where, against whom? Behavioral  
497 Ecology and Sociobiology 55:439–446. doi: 10.1007/s00265-003-0733-x
- 498 Scott MP (2006) The role of juvenile hormone in competition and cooperation by burying beetles. Journal of  
499 Insect Physiology. doi: 10.1016/j.jinsphys.2006.04.006
- 500 Stacey PB, Ligon JD (1991) The Benefits-of-Philopatry Hypothesis for the Evolution of Cooperative Breeding:  
501 Variation in Territory Quality and Group Size Effects. The American Naturalist 137:831–846. doi:  
502 10.1086/285196
- 503 Stander PE (1992) Cooperative hunting in lions: the role of the individual. Behavioral Ecology and  
504 Sociobiology 29:445–454. doi: 10.1007/BF00170175
- 505 Szetei V, Miklósi Á, Topál J, Csányi V (2003) When dogs seem to lose their nose: an investigation on the use of  
506 visual and olfactory cues in communicative context between dog and owner. Applied Animal Behaviour  
507 Science 83:141–152. doi: 10.1016/S0168-1591(03)00114-X
- 508 Udell MAR (2015) When dogs look back: inhibition of independent problem-solving behaviour in domestic  
509 dogs ( *Canis lupus familiaris* ) compared with wolves ( *Canis lupus* ). Biology Letters 11:20150489. doi:  
510 10.1098/rsbl.2015.0489
- 511 Vanak AT, Gompper ME (2009) Dietary Niche Separation Between Sympatric Free-Ranging Domestic Dogs  
512 and Indian Foxes in Central India. Journal of Mammalogy 90:1058–1065. doi: 10.1644/09-MAMM-A-  
513 107.1
- 514 Werdenich D, Huber L (2002) Social factors determine cooperation in marmosets. Animal Behaviour. doi:  
515 10.1006/anbe.2002.9001

516

517 **Figure Legends**

518 **Fig 1 Image showing the experimental set-up of Task 3** Picture courtesy – Shubhra Sau.

519 **Fig 2 Success rates in task 1 (unfamiliar) and task 2 (familiar).** Bar graph showing percentage of groups that  
520 successfully solved the two tasks. Groups in task 2 showed significantly higher success rates than task 1.  
521 Different letters indicate a significant difference between the categories.

522 **Fig 3 Duration of cooperative task solving of groups (Task 1 and 2) in ‘pair’, ‘triad’ and ‘tetrad or more’**  
523 **formations.** Box and whisker plot illustrating the duration of group task solving in Task 1 and 2. Both tasks 1  
524 and 2 showed that the ‘pairs’ from the groups worked longer as cooperating units than ‘triads’ and ‘tetrad or  
525 more’ (Task 1 - Kruskal-Wallis test,  $\chi^2 = 15.648$ ,  $d_{\text{Cohen}} = 1.209$ ,  $df = 2$ ,  $p < 0.0001$ ; Task 2 - Task 2 - Kruskal-  
526 Wallis test,  $\chi^2 = 28.224$ ,  $d_{\text{Cohen}} = 2.429$ ,  $df = 2$ ,  $p < 0.0001$ ). Boxes represent interquartile range, horizontal bars  
527 within boxes indicate median values, and whiskers represent the upper range of the data. Different letters  
528 indicate a significant difference within tasks.

529 **Fig 4 Success rates in task 3.** Histogram showing the success rates in corresponding number of groups in Task  
530 3. No difference was found between lower success ( $< 50\%$ ) and higher success ( $\geq 50\%$ ) rates (Chi-squared  
531 goodness of fit,  $\chi^2 = 1.385$ ,  $d_{\text{Cohen}} = 0.474$ ,  $N = 26$ ,  $df = 1$ ,  $p = 0.239$ ).

532 **Fig 5 Correlation between ToI and food sharing in Task 3** Spearman- rank correlation showed a strong  
533 positive relationship between average ToI and food sharing in groups of Task 3 ( $r_s = 0.816$ ). Group food sharing  
534 values (in percentage) were plotted on the Y- axis and ToI values on the X-axis.

535

536 **Figure 1**

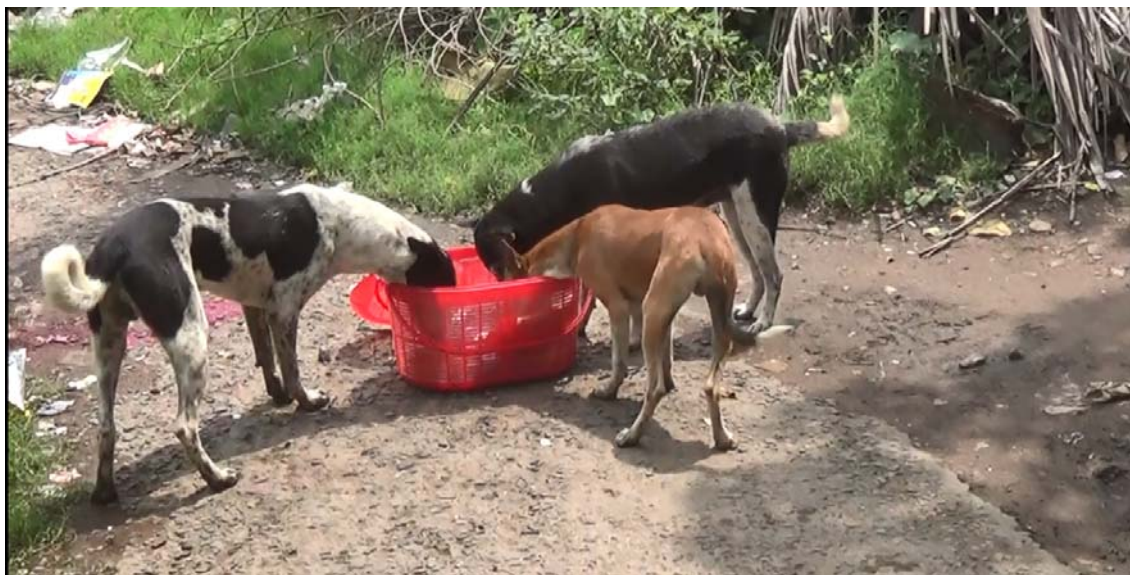

537

538

539 **Figure 2**

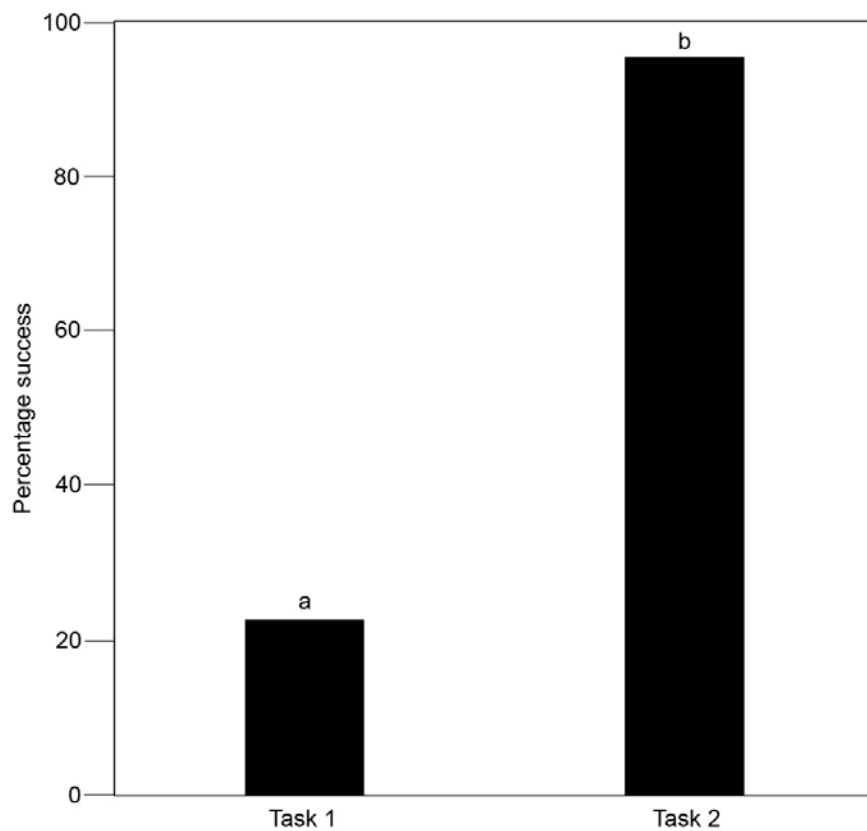

540

541

542 **Figure 3**

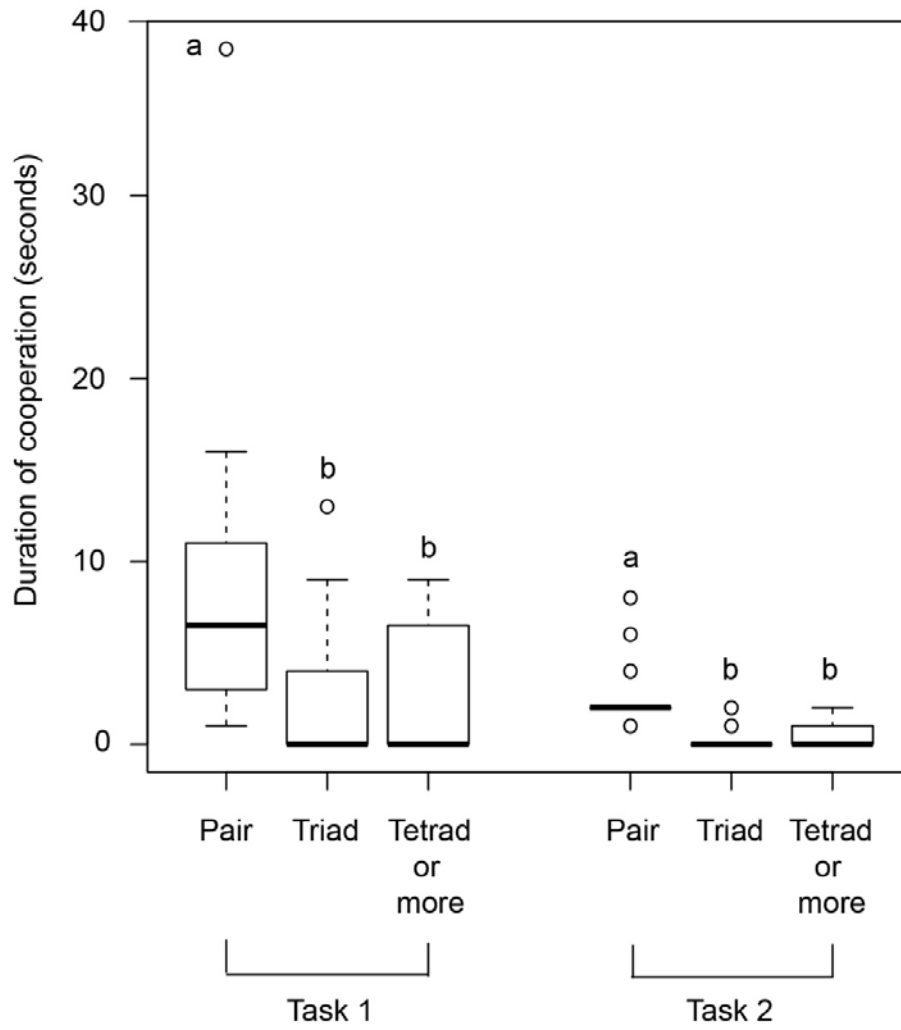

543

544

545 **Figure 4**

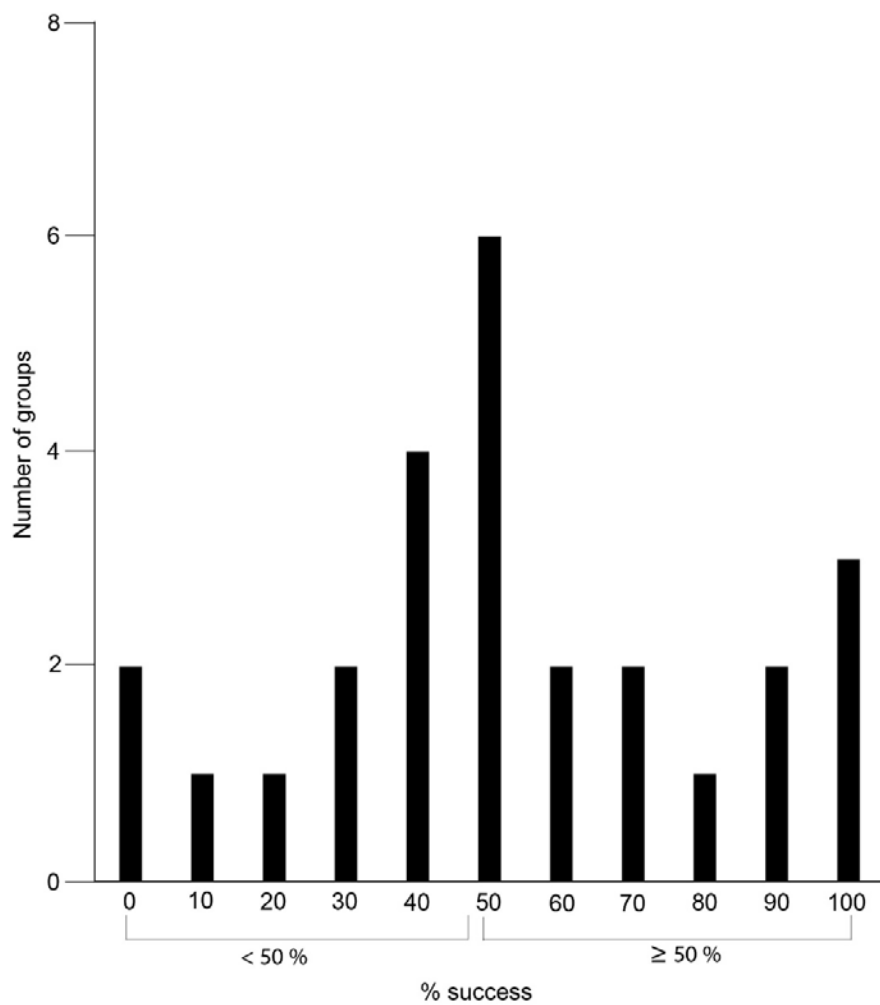

546

547



548 **Figure 5**

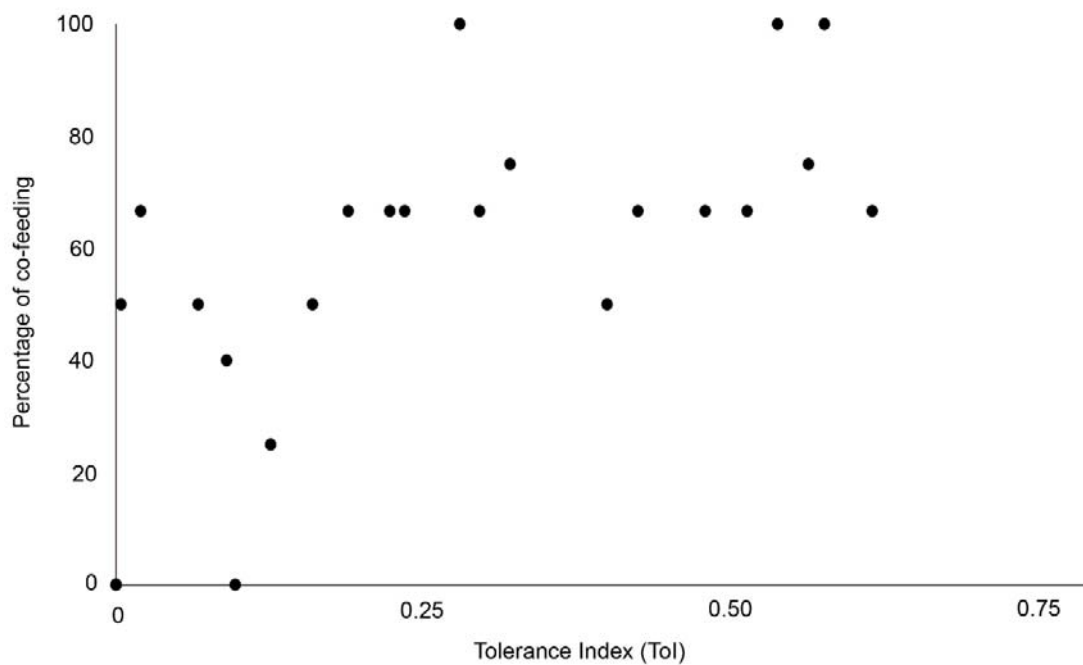

549
